# Supplementary material for: Toehold clipping: A mechanism for remote control of DNA strand displacement
Source: PubMed Central journal article supplement — Nucleic Acids Res. 2022 Dec 8;51(8):4055–63. doi: 10.1093/nar/gkac1152 (PMC10164547; doi:10.1093/nar/gkac1152), 2022-12-08
Supplement: gkac1152_supplemental_file.pdf [file gkac1152_supplemental_file.pdf]

## Supplementary Data

### **Toehold clipping:**

## **A mechanism for remote control of DNA strand displacement**

Hiba Faheem,<sup>1,2</sup> Johnsi Mathivanan,<sup>1,2</sup> Hannah Talbot,<sup>1</sup> Hana Zeghal,<sup>1</sup> Sweta Vangaveti,<sup>1</sup>  
Jia Sheng,<sup>1,2</sup> Alan A. Chen<sup>1,2</sup> and Arun Richard Chandrasekaran<sup>1\*</sup>

<sup>1</sup>*The RNA Institute, University at Albany, State University of New York, Albany, NY, USA.*

<sup>2</sup>*Department of Chemistry, University at Albany, State University of New York, Albany, NY, USA.*

Email: arun [at] albany.edu

| Name            | Sequence (5' to 3')                                                                | Length |
|-----------------|------------------------------------------------------------------------------------|--------|
| Strand L        | AGGCACCATCGTAGGTTTTTCTTGCCAGGCACCATCGTAGGTTTTTCT<br>TGCCAGGCACCATCGTAGGTTTTTCTTGCC | 78     |
| Strand M        | AGCAACCTGCCTGGCAAGCCTACGATGGACACGGT <b>AACGACT</b>                                 | 42     |
| Strand S        | ACCGTGTGGTTGCT <b>AGTCGTT</b>                                                      | 21     |
| S-blunt         | AGTCGTTACCGTGTGGTTGCT                                                              | 21     |
| S-DNA-TH        | ACCGTGTGGTTGCT <b>AGTCGTT</b> <u>CCTCAAGA</u>                                      | 29     |
| S-PCL-TH        | ACCGTGTGGTTGCT <b>AGTCGTT</b> -PCL- <u>CCTCAAGA</u>                                | 29     |
| S-RNA-TH        | ACCGTGTGGTTGCT <b>AGTCGTT</b> <u>rCrCrUrCrArArGrA</u>                              | 29     |
| S-complement    | AACGACTAGCAACCACACGGT                                                              | 21     |
| Invading strand | TCTTGAGGAACGACTAGCAACCACACGGT                                                      | 29     |

**Table S1.** Sequences for duplexes and tetrahedra. Sequences in bold are sticky ends and sequences underlined are the toehold region.

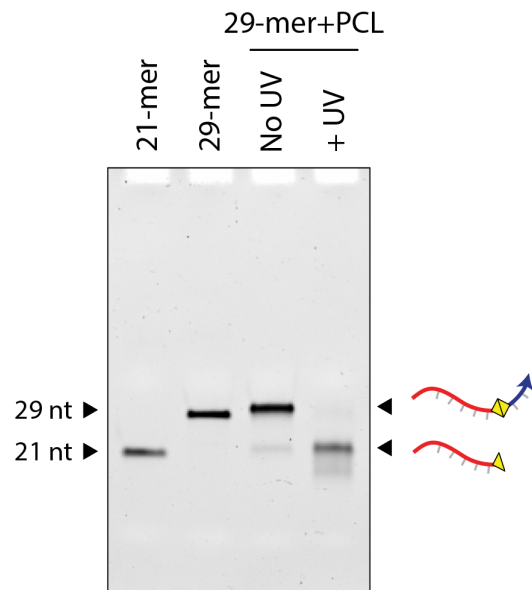

**Figure S1.** Cleavage of single stranded DNA containing a PCL analyzed by denaturing PAGE. Full image of gel shown in Figure 1e.

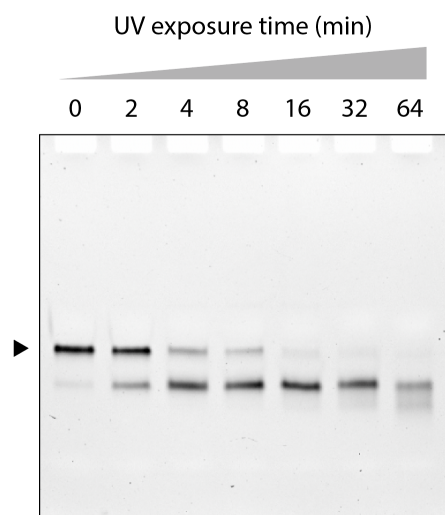

**Figure S2.** Time series of photocleavage in PCL-containing DNA analyzed using denaturing PAGE. Full image of gel shown in Figure 1f.

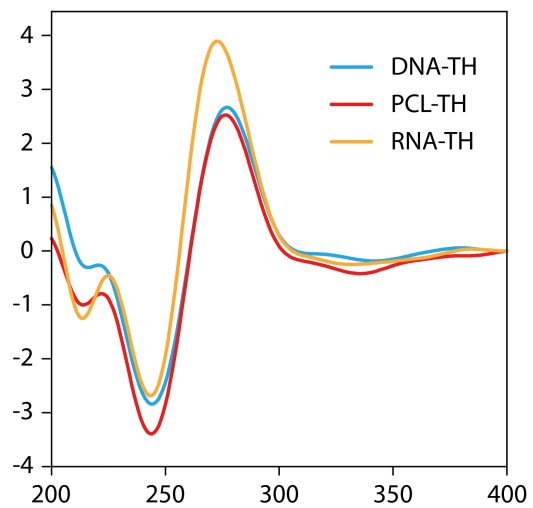

**Figure S3.** Circular dichroism spectra of duplexes with DNA toehold, PCL toehold and RNA toehold.

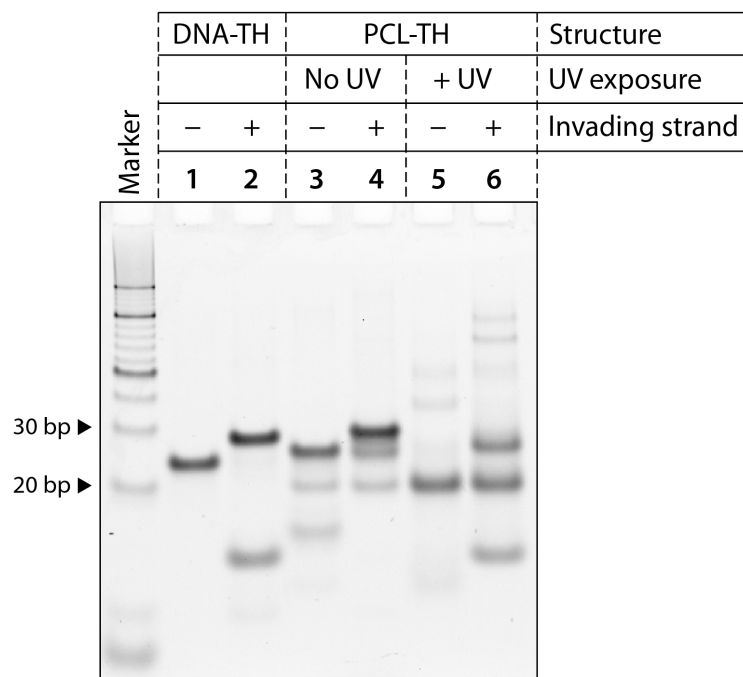

**Figure S4.** Strand displacement in duplexes before and after toehold clipping by UV. Full image of gel shown in Figure 1h.

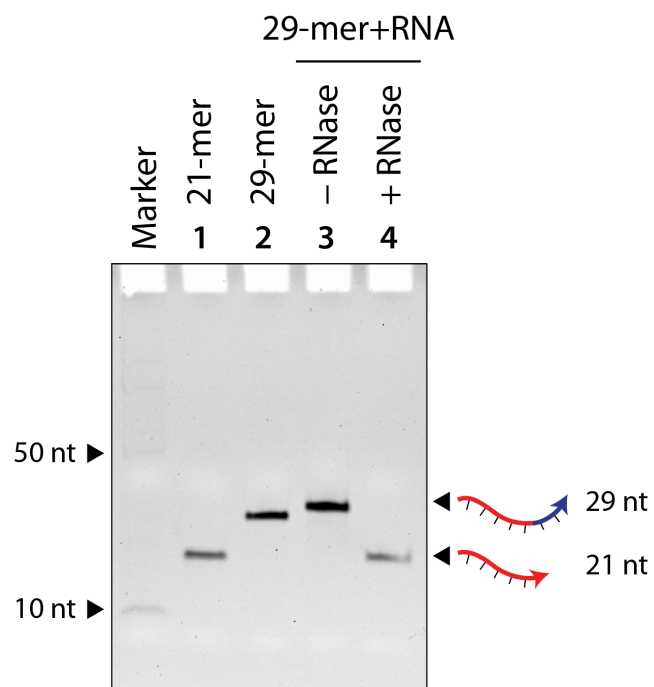

**Figure S5.** Degradation of RNA portion of a chimera strand containing DNA and RNA analyzed by denaturing PAGE. Full image of gel shown in Figure 3c.

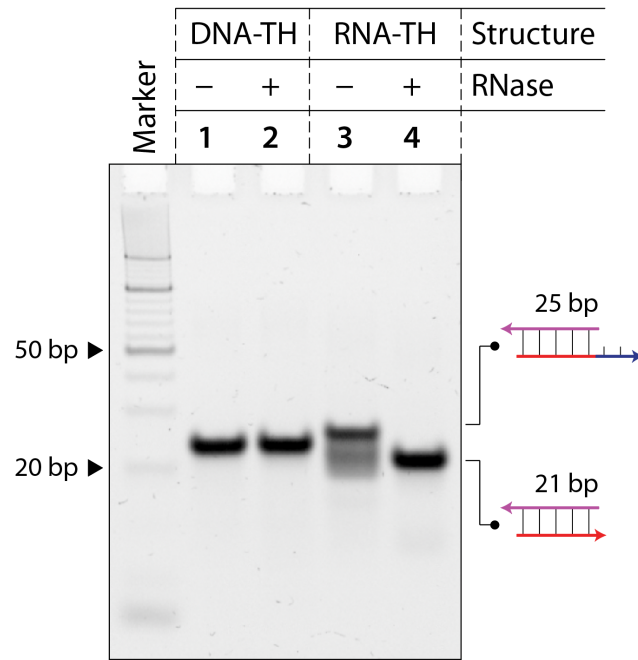

**Figure S6.** RNase-induced toehold clipping in DNA duplex. Full image of gel shown in Figure 3d.



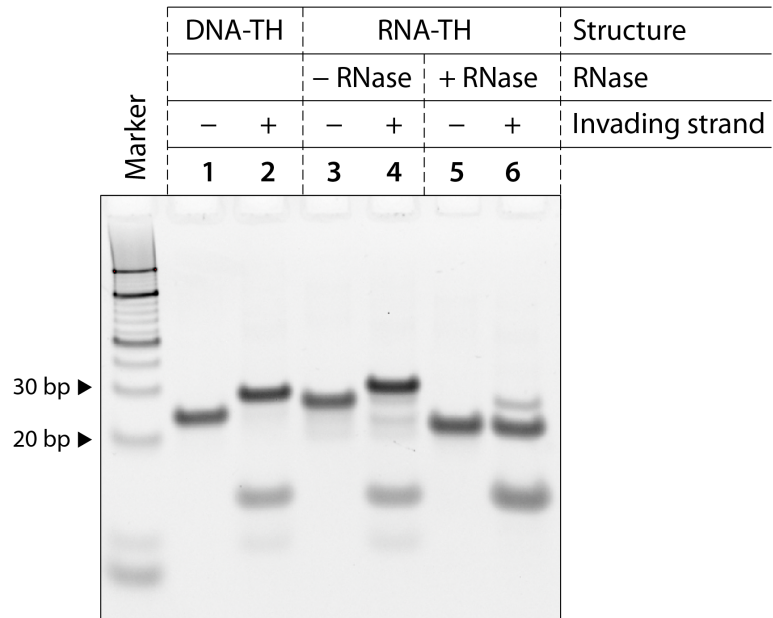

**Figure S7.** Strand displacement in duplexes before and after toehold clipping by RNase A. Full image of gel shown in Figure 3e.

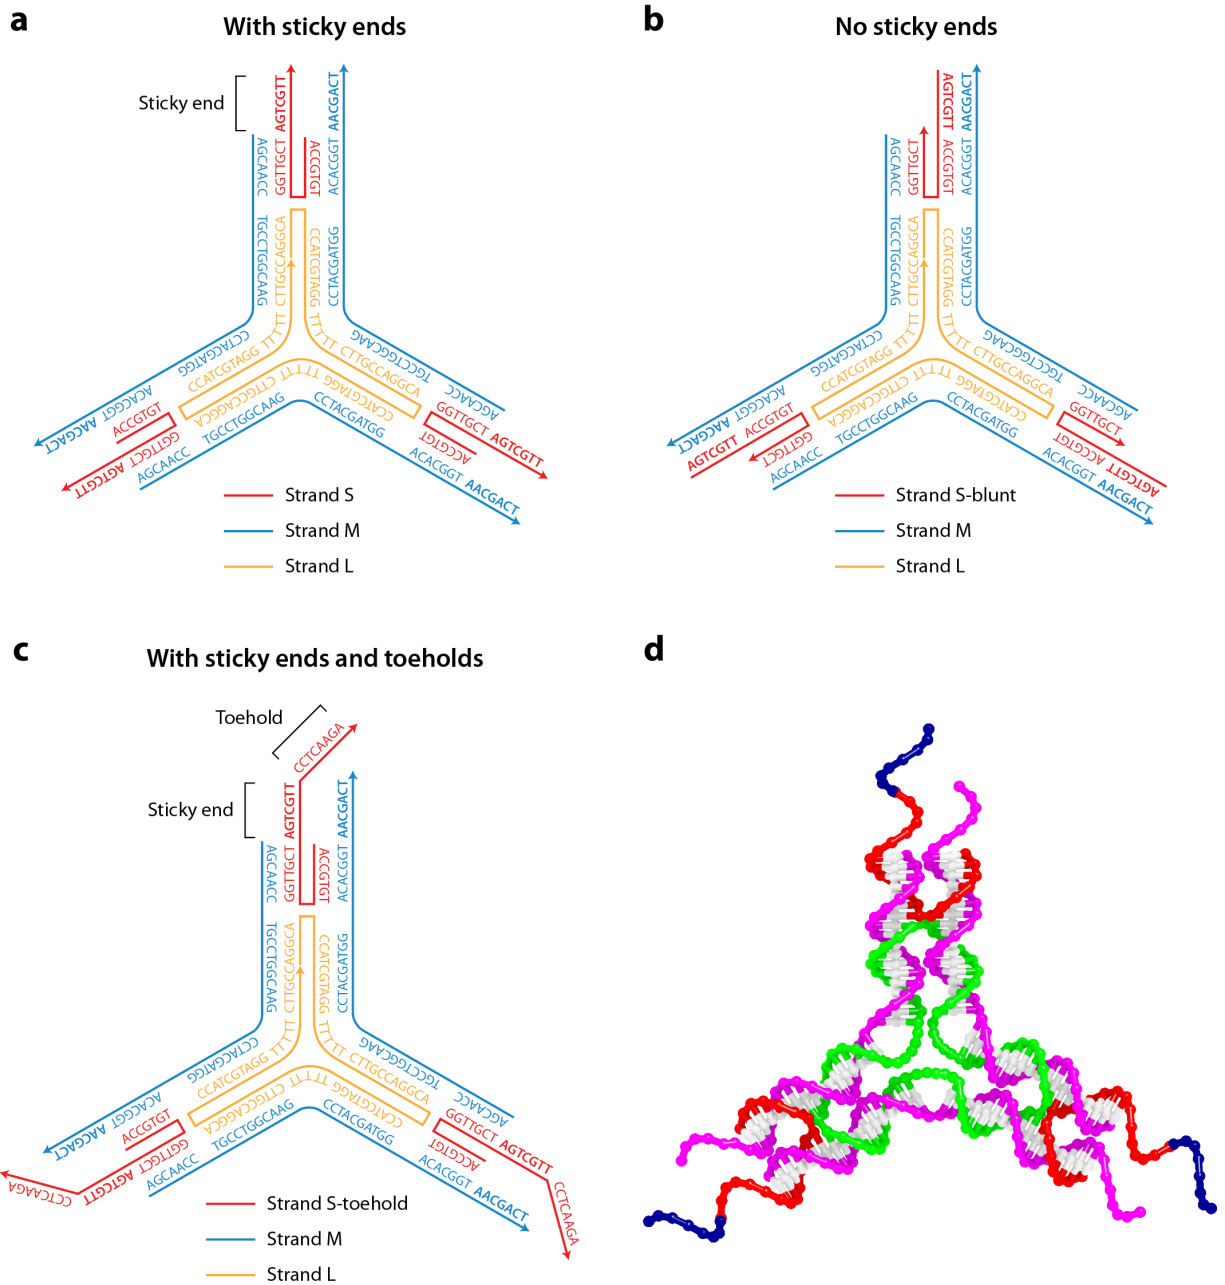

**Figure S8.** Design and sequence of the 3-point-star motif. (a) The 3-point-star motif is three-fold symmetric and consists of strands L, M and S in the ratio 1:3:3. Motifs connect via sticky ends to form higher order structures. Four such motifs assemble to form the DNA tetrahedron. (b) A blunt-ended motif without sticky ends. (c) Strand S in the motif has a single stranded extension that is not part of the tetrahedron; this acts as the toehold for the strand displacement process. (d) Molecular model of the 3-point-star motif.
